# Supplementary material for: Genome-Wide Characterization, Expression Profile Analysis of WRKY Family Genes in Santalum album and Functional Identification of Their Role in Abiotic Stress
Source: PubMed Central journal article supplement (PMC6888422; doi:10.3390/ijms20225676), 2019-11-13
Supplement: ijms-20-05676-s001.pdf [file ijms-20-05676-s001.pdf]

**Table S1.** The GenBank accession numbers of 64 *SaWRKY* genes.

| Gene name       | GenBank accession number | Gene name       | GenBank accession number |
|-----------------|--------------------------|-----------------|--------------------------|
| <i>SaWRKY1</i>  | MG655189                 | <i>SaWRKY33</i> | MN335843                 |
| <i>SaWRKY2</i>  | MN335812                 | <i>SaWRKY34</i> | MN335844                 |
| <i>SaWRKY3</i>  | MN335813                 | <i>SaWRKY35</i> | MN335845                 |
| <i>SaWRKY4</i>  | MN335814                 | <i>SaWRKY36</i> | MN335846                 |
| <i>SaWRKY5</i>  | MN335815                 | <i>SaWRKY37</i> | MN335847                 |
| <i>SaWRKY6</i>  | MN335816                 | <i>SaWRKY38</i> | MN335848                 |
| <i>SaWRKY7</i>  | MN335817                 | <i>SaWRKY39</i> | MN335849                 |
| <i>SaWRKY8</i>  | MN335818                 | <i>SaWRKY40</i> | MN335850                 |
| <i>SaWRKY9</i>  | MN335819                 | <i>SaWRKY41</i> | MN335851                 |
| <i>SaWRKY10</i> | MN335820                 | <i>SaWRKY42</i> | MN335852                 |
| <i>SaWRKY11</i> | MN335821                 | <i>SaWRKY43</i> | MN335853                 |
| <i>SaWRKY12</i> | MN335822                 | <i>SaWRKY44</i> | MN335854                 |
| <i>SaWRKY13</i> | MN335823                 | <i>SaWRKY45</i> | MN335855                 |
| <i>SaWRKY14</i> | MN335824                 | <i>SaWRKY46</i> | MN335856                 |
| <i>SaWRKY15</i> | MN335825                 | <i>SaWRKY47</i> | MN335857                 |
| <i>SaWRKY16</i> | MN335826                 | <i>SaWRKY48</i> | MN335858                 |
| <i>SaWRKY17</i> | MN335827                 | <i>SaWRKY49</i> | MN335859                 |
| <i>SaWRKY18</i> | MN335828                 | <i>SaWRKY50</i> | MN335860                 |
| <i>SaWRKY19</i> | MN335829                 | <i>SaWRKY51</i> | MN335861                 |
| <i>SaWRKY20</i> | MN335830                 | <i>SaWRKY52</i> | MN335862                 |
| <i>SaWRKY21</i> | MN335831                 | <i>SaWRKY53</i> | MN335863                 |
| <i>SaWRKY22</i> | MN335832                 | <i>SaWRKY54</i> | MN335864                 |
| <i>SaWRKY23</i> | MN335833                 | <i>SaWRKY55</i> | MN335865                 |
| <i>SaWRKY24</i> | MN335834                 | <i>SaWRKY56</i> | MN335866                 |
| <i>SaWRKY25</i> | MN335835                 | <i>SaWRKY57</i> | MN335867                 |
| <i>SaWRKY26</i> | MN335836                 | <i>SaWRKY58</i> | MN335868                 |
| <i>SaWRKY27</i> | MN335837                 | <i>SaWRKY59</i> | MN335869                 |
| <i>SaWRKY28</i> | MN335838                 | <i>SaWRKY60</i> | MN335870                 |
| <i>SaWRKY29</i> | MN335839                 | <i>SaWRKY61</i> | MN335871                 |
| <i>SaWRKY30</i> | MN335840                 | <i>SaWRKY62</i> | MN335872                 |
| <i>SaWRKY31</i> | MN335841                 | <i>SaWRKY63</i> | MN335873                 |
| <i>SaWRKY32</i> | MN335842                 | <i>SaWRKY64</i> | MN335874                 |

**Table S2. The fold change of *SaWRKY* genes under SA stress in callus of *S. album* calculated from the  $2^{-\Delta\Delta Cq}$  value.**

| Gene name       | 3 h         |            | 6 h         |            |
|-----------------|-------------|------------|-------------|------------|
|                 | fold change | regulation | fold change | regulation |
| <i>SaWRKY1</i>  | 2.206797275 | up         | 1.14750389  |            |
| <i>SaWRKY2</i>  | 0.738134085 |            | 0.819406687 |            |
| <i>SaWRKY3</i>  | 14.90117762 | up         | 9.509590983 | up         |
| <i>SaWRKY4</i>  | 1.472105145 |            | 0.39267108  | down       |
| <i>SaWRKY5</i>  | 0.929858303 |            | 0.548151006 |            |
| <i>SaWRKY6</i>  | 0.571152386 |            | 0.726327684 |            |
| <i>SaWRKY7</i>  | 1.813481997 | up         | 0.691940304 |            |
| <i>SaWRKY8</i>  | 0.566519826 |            | 0.253004586 | down       |
| <i>SaWRKY9</i>  | 4.178668397 | up         | 2.31997935  | up         |
| <i>SaWRKY10</i> | 0.546480355 |            | 0.691907677 |            |
| <i>SaWRKY11</i> | 1.420085027 |            | 5.212053281 | up         |
| <i>SaWRKY12</i> | 0.442549493 | down       | 0.744507345 |            |
| <i>SaWRKY13</i> | 0.131955327 | down       | 0.980030335 |            |
| <i>SaWRKY14</i> | 0.521100051 |            | 0.553634974 |            |
| <i>SaWRKY15</i> | 0.801186024 |            | 1.720169597 | up         |
| <i>SaWRKY16</i> | 0.887492474 |            | 1.49123034  |            |
| <i>SaWRKY17</i> | 0.635988087 |            | 1.198649418 |            |
| <i>SaWRKY18</i> | 0.619998824 |            | 0.747507923 |            |
| <i>SaWRKY20</i> | 1.110148034 |            | 0.91190098  |            |
| <i>SaWRKY21</i> | 0.387679448 | down       | 0.459665935 | down       |
| <i>SaWRKY22</i> | 0.645768995 |            | 0.333305932 | down       |
| <i>SaWRKY23</i> | 0.674368844 |            | 0.750873586 |            |
| <i>SaWRKY24</i> | 0.51170785  |            | 1.551569184 | up         |
| <i>SaWRKY25</i> | 3.867605091 | up         | 4.482831502 | up         |
| <i>SaWRKY26</i> | 0.440543513 | down       | 0.400721111 | down       |
| <i>SaWRKY27</i> | 0.274681837 | down       | 0.165934562 | down       |
| <i>SaWRKY28</i> | 4.173614691 | up         | 0.608460515 |            |
| <i>SaWRKY29</i> | 1.128701394 |            | 0.963280002 |            |
| <i>SaWRKY30</i> | 0.47464644  | down       | 0.481256398 | down       |
| <i>SaWRKY31</i> | 0.863530447 |            | 0.909956815 |            |
| <i>SaWRKY32</i> | 0.915718443 |            | 0.38254082  | down       |
| <i>SaWRKY33</i> | 0.822791255 |            | 0.510075435 |            |
| <i>SaWRKY34</i> | 0.446491486 | down       | 0.371755134 | down       |
| <i>SaWRKY35</i> | 1.174505475 |            | 23.57493436 | up         |
| <i>SaWRKY36</i> | 0.468041766 | down       | 0.251033015 | down       |
| <i>SaWRKY37</i> | 2.686446144 | up         | 10.67282853 | up         |
| <i>SaWRKY38</i> | 2.26204041  | up         | 1.362718363 |            |
| <i>SaWRKY39</i> | 1.102451328 |            | 1.165597215 |            |

|                 |             |    |             |    |
|-----------------|-------------|----|-------------|----|
| <i>SaWRKY40</i> | 2.48301904  | up | 2.642286316 | up |
| <i>SaWRKY41</i> | 1.113994177 |    | 0.694815365 |    |
| <i>SaWRKY42</i> | 1.167922597 |    | 0.752770731 |    |
| <i>SaWRKY44</i> | 0.764665187 |    | 1.148625057 |    |

**Table S3. The fold change of *SaWRKY* genes under MeJA stress in callus of *S. album* calculated from the  $2^{-\Delta\Delta Cq}$  value.**

| Gene name       | 3 h         |            | 6 h         |            |
|-----------------|-------------|------------|-------------|------------|
|                 | fold change | regulation | fold change | regulation |
| <i>SaWRKY1</i>  | 1.850499998 | up         | 1.116481287 |            |
| <i>SaWRKY2</i>  | 1.234830365 |            | 0.944131409 |            |
| <i>SaWRKY3</i>  | 1.460169714 |            | 1.793155605 | up         |
| <i>SaWRKY4</i>  | 9.291316934 | up         | 4.04942672  | up         |
| <i>SaWRKY5</i>  | 1.295365194 |            | 0.980524758 |            |
| <i>SaWRKY6</i>  | 1.554448956 | up         | 1.221890726 |            |
| <i>SaWRKY7</i>  | 2.648604789 | up         | 0.920299045 |            |
| <i>SaWRKY8</i>  | 1.863783813 | up         | 0.948244669 |            |
| <i>SaWRKY9</i>  | 1.055996357 |            | 0.519400591 |            |
| <i>SaWRKY10</i> | 0.598666561 |            | 0.558012883 |            |
| <i>SaWRKY11</i> | 2.396926724 | up         | 0.882103176 |            |
| <i>SaWRKY12</i> | 1.366054073 |            | 1.153669389 |            |
| <i>SaWRKY13</i> | 0.467230263 | down       | 0.409969384 | down       |
| <i>SaWRKY14</i> | 0.883029921 |            | 0.666614508 |            |
| <i>SaWRKY15</i> | 1.587356106 | up         | 1.319549139 |            |
| <i>SaWRKY16</i> | 2.320418765 | up         | 1.127707512 |            |
| <i>SaWRKY17</i> | 1.769904088 | up         | 1.303084813 |            |
| <i>SaWRKY18</i> | 0.958319167 |            | 0.761902059 |            |
| <i>SaWRKY20</i> | 1.675082345 | up         | 0.973615387 |            |
| <i>SaWRKY21</i> | 0.627552569 |            | 0.7860783   |            |
| <i>SaWRKY22</i> | 1.481163575 |            | 1.203111244 |            |
| <i>SaWRKY23</i> | 1.304516794 |            | 0.468479142 | down       |
| <i>SaWRKY24</i> | 0.378559663 | down       | 0.768066635 |            |
| <i>SaWRKY25</i> | 0.530062154 |            | 0.412450775 | down       |
| <i>SaWRKY26</i> | 2.804674798 | up         | 1.615387795 | up         |
| <i>SaWRKY27</i> | 1.294998757 |            | 0.448508441 | down       |
| <i>SaWRKY28</i> | 1.38483034  |            | 0.398180941 | down       |
| <i>SaWRKY29</i> | 2.486928841 | up         | 1.061897949 |            |
| <i>SaWRKY30</i> | 1.078970351 |            | 0.973538159 |            |
| <i>SaWRKY31</i> | 1.258091073 |            | 0.787537378 |            |
| <i>SaWRKY32</i> | 1.486242714 |            | 1.121918055 |            |
| <i>SaWRKY33</i> | 0.630597355 |            | 0.58252386  |            |
| <i>SaWRKY34</i> | 1.205765567 |            | 0.933522999 |            |
| <i>SaWRKY35</i> | 1.215475927 |            | 0.783541428 |            |
| <i>SaWRKY36</i> | 2.052148714 | up         | 1.381840289 |            |
| <i>SaWRKY37</i> | 0.587130922 |            | 1.220275288 |            |
| <i>SaWRKY38</i> | 1.661171585 | up         | 1.757088241 | up         |
| <i>SaWRKY39</i> | 1.548007285 | up         | 1.08405258  |            |

|                 |             |    |             |    |
|-----------------|-------------|----|-------------|----|
| <i>SaWRKY40</i> | 1.781933089 | up | 1.16922189  |    |
| <i>SaWRKY41</i> | 1.215749675 |    | 1.193757678 |    |
| <i>SaWRKY42</i> | 2.016003264 | up | 1.58294975  | up |
| <i>SaWRKY44</i> | 1.064059237 |    | 0.837382937 |    |

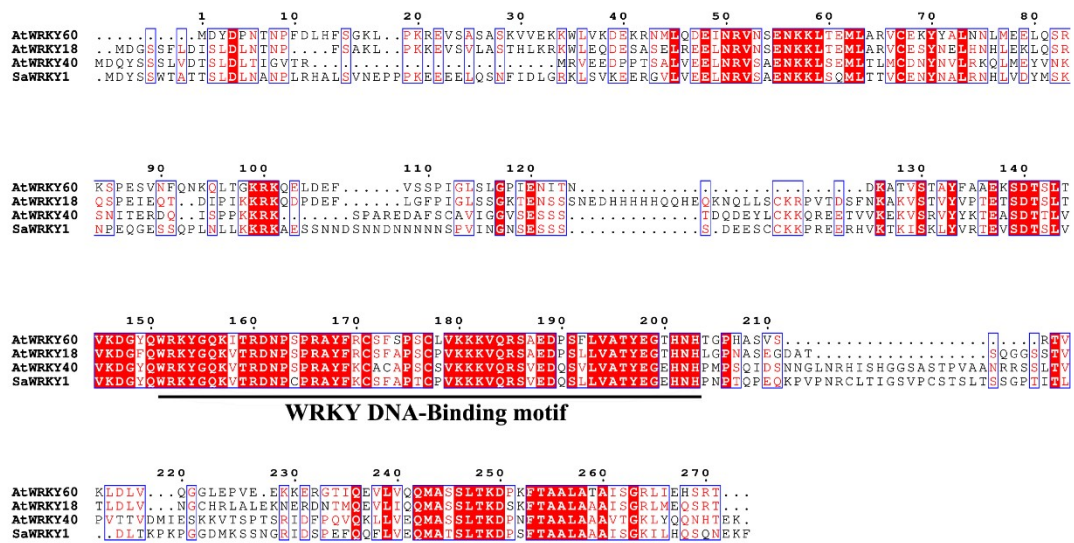

**Figure S1.** Multiple sequence alignment among SaWRKY1, AtWRKY40, AtWRKY18, and AtWRKY60.

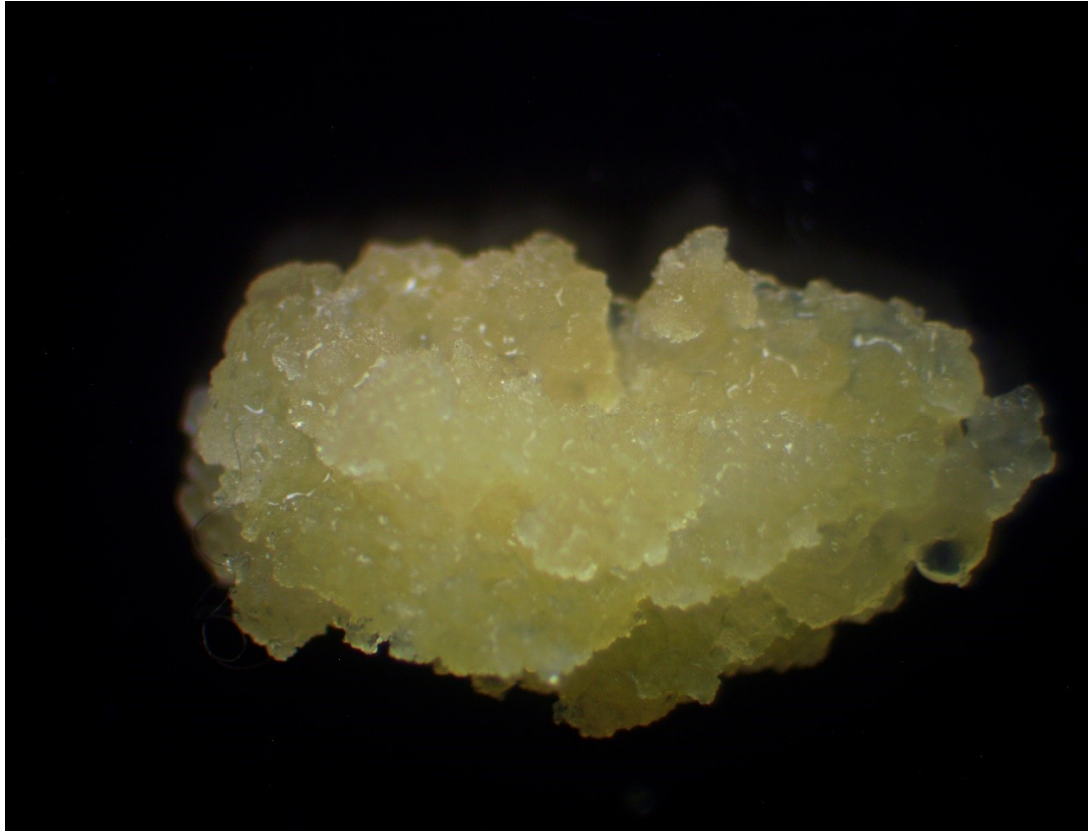

**Figure S2.** Callus used in this study.

**Table S4. Primers used for RT-qPCR.**

| Primer name | Primer sequence              | Primer name | Primer sequence               |
|-------------|------------------------------|-------------|-------------------------------|
| SaWRKY1F    | 5'-TGAGAGCAGCAACAACGATAG-3'  | SaWRKY1R    | 5'-CGTTCTTCCCTTGGCTTCTT-3'    |
| SaWRKY2F    | 5'-GCCTCATCCGCTCATCATAATA-3' | SaWRKY2R    | 5'-CTCCACCTATAGCCATCATCAAG-3' |
| SaWRKY3F    | 5'-CCGCCAAAGAGAGATCACAA-3'   | SaWRKY3R    | 5'-CATTCTCCGTGCCGCTATTA-3'    |
| SaWRKY4F    | 5'-GAAAGGGAACAAGCCGAAGA-3'   | SaWRKY4R    | 5'-ACCTGTATCCATCCTCCAGAT-3'   |
| SaWRKY5F    | 5'-TAGAGAGCAAAGGAGGTCAGA-3'  | SaWRKY5R    | 5'-GGGAAGGTGCACTTGTAGTAA-3'   |
| SaWRKY6F    | 5'-ACGAAGAGACGGACGTATGA-3'   | SaWRKY6R    | 5'-CAACGCTCAACAGAGGAGAA-3'    |
| SaWRKY7F    | 5'-TCATGAATCGGGTCCCTTTG-3'   | SaWRKY7R    | 5'-TCCAGCGAGAAATCCAATCC-3'    |
| SaWRKY8F    | 5'-GAGAAGGAACGGCTGATGTTAT-3' | SaWRKY8R    | 5'-GCTCAGGGCTCTTACTTTGTT-3'   |
| SaWRKY9F    | 5'-CCCACCTTATCTTCAACGAAGT-3' | SaWRKY9R    | 5'-AGCTGAGGAGGATGGAGTTA-3'    |
| SaWRKY10F   | 5'-GAGGAGGAAGAAGTGAATCAG-3'  | SaWRKY10R   | 5'-GAGCTTGGAGAGATCGGTAATC-3'  |
| SaWRKY11F   | 5'-GCTCAGTCATGTAACCGACAA-3'  | SaWRKY11R   | 5'-CCAAGCGAAGATCCTCAA-3'      |
| SaWRKY12F   | 5'-CTAGTGCTGGATGCTCTGTTAG-3' | SaWRKY12R   | 5'-ATTGTGCTTCCCTCGTATGT-3'    |
| SaWRKY13F   | 5'-AGAAGTGCACCGTGAAGAAA-3'   | SaWRKY13R   | ATGGACAGTGGTGGTTGTG-3'        |
| SaWRKY14F   | 5'-ACCTACGCCTTTGACCATAAC-3'  | SaWRKY14R   | 5'-CGGCGATGGACGATGATAC-3'     |
| SaWRKY15F   | 5'-GTCCGTGTTATCGTCTCTTC-3'   | SaWRKY15R   | 5'-CTTGGCTTGCTCACTTTGTTAG-3'  |
| SaWRKY16F   | 5'-ATTCATCGGGCCGTTTCTC-3'    | SaWRKY16R   | CTTCTTCTTCCGAGGGTTTC-3'       |
| SaWRKY17F   | 5'-ACCCGAGACGATAAGAAGGA-3'   | SaWRKY17R   | 5'-ATTGGTCGCTACTGGTATTGG-3'   |
| SaWRKY18F   | 5'-GGTTATGATGGCGAAGGAGATG-3' | SaWRKY18R   | 5'-ACTACTCTGGGTTCTCGTATGG-3'  |
| SaWRKY20F   | 5'-AGAGGAAGAGGAAGAGGAAGAG-3' | SaWRKY20R   | 5'-CCGCCGTTAGGGTTTGTAAAT-3'   |
| SaWRKY21F   | 5'-GGTTCGGTTTACGATGAACT-3'   | SaWRKY21R   | 5'-GGAGGAGGAAGGCATGTTATT-3'   |
| SaWRKY22F   | 5'-TGGGCAGAAGCCAATCAA-3'     | SaWRKY22R   | 5'-GGTCTTCCAAGCATCTCTCTAC-3'  |
| SaWRKY23F   | 5'-ATCCACCACTTGCTCCAATC-3'   | SaWRKY23R   | 5'-CGGGCACTTCTACTCTTGTAG-3'   |



|           |                               |           |                               |
|-----------|-------------------------------|-----------|-------------------------------|
| SaWRKY24F | 5'-TCCACCCTCAGCACTTAAAC-3'    | SaWRKY24R | 5'-CTCTTCTCTTACCTCACCCATTT-3' |
| SaWRKY25F | 5'-GCCGGGTCAATATCACTCAA-3'    | SaWRKY25R | 5'-TCACCACTTTCTGCCCATAC-3'    |
| SaWRKY26F | 5'-CCCTGATGATGACAGCCTAAT-3'   | SaWRKY26R | 5'-GCTCCATTTGCTCTTCCTTTC-3'   |
| SaWRKY27F | 5'-GGCTACCGATGGCGTAAATA-3'    | SaWRKY27R | 5'-ATGGATCTTCTGAGGACCTTTC-3'  |
| SaWRKY28F | 5'-CAAGTTCCCAAGAGGCTACTAC-3'  | SaWRKY28R | 5'-CCGATAAGTGACCTCGAAGATG-3'  |
| SaWRKY29F | 5'-ACGTGAAGAAGAGAGTGGAGAG-3'  | SaWRKY29R | 5'-ATGGCAACTGGTTGAGGTAAAG-3'  |
| SaWRKY30F | 5'-AAGCTGAGACAGTGAACGATG-3'   | SaWRKY30R | 5'-TCCCGCATTGAACACCTATAA-3'   |
| SaWRKY31F | 5'-AGAGGCGGAGAGAGTAGTTATAG-3' | SaWRKY31R | 5'-GTTGGAGGGTGATGCAGTAA-3'    |
| SaWRKY32F | 5'-GAGGCGAGAGTAGCGTTTATG-3'   | SaWRKY32R | 5'-GCAGTGGTGCAACGATAGTA-3'    |
| SaWRKY33F | 5'-TTCTTCGCCCACTTGTCTAC-3'    | SaWRKY33R | 5'-GGAGCCCATAATCGCTCAA-3'     |
| SaWRKY34F | 5'-CCAAATCCAAATGCCTCCAATAG-3' | SaWRKY34R | 5'-GGTAATCCTGAACCAGACTGAAA-3' |
| SaWRKY35F | 5'-CCATGTCCACGAGCCTATTATC-3'  | SaWRKY35R | 5'-GGTGGTTATGTGTGCCTTCA-3'    |
| SaWRKY36F | 5'-GCGGAAGCAAGACTCTCATAA-3'   | SaWRKY36R | 5'-CAGCGGTATCCATCATTCACTAT-3' |
| SaWRKY37F | 5'-CTTCGGAGGAGCTTTCTGATT-3'   | SaWRKY37R | 5'-CACGGTGGATAGAGCATTCTT-3'   |
| SaWRKY38F | 5'-AGTGAGGAAGTGGCTGATAATG-3'  | SaWRKY38R | 5'-GCTGGCTCTGAAACCCTATT-3'    |
| SaWRKY39F | 5'-AAGGTTGAGCGTCTCTTGAT-3'    | SaWRKY39R | 5'-CTACCATCTCTTGTTGGCTTACT-3' |
| SaWRKY40F | 5'-GGTGCAGTTGGATGTGAATA-3'    | SaWRKY40R | 5'-CTCGTTTCCCTCGTTTCTCTTC-3'  |
| SaWRKY41F | 5'-GCTGTGCTCACGACTTATGA-3'    | SaWRKY41R | 5'-TGGCGGTCTGTTTAGTGTATG-3'   |
| SaWRKY42F | 5'-GTCATGGGAGAGTCAGAAAGATG-3' | SaWRKY42R | 5'-GGAACCGCAAGGGATTAGTT-3'    |
| SaWRKY44F | 5'-GTGGAACGCTCTTATGATGGA-3'   | SaWRKY44R | 5'-GGCGTCTAGGTTGAGGTTTAG-3'   |
| Fbp1F     | 5'-TGGCGTGCCTGTTTCTATC-3'     | Fbp1R     | 5'-CGCACTCCATAGGTTTCTTCT-3'   |
| Fbp3F     | 5'-CCTCGTGTACTGGGAAATGG-3'    | Fbp3R     | 5'-GCAAGAACGCAATGCCTAAA-3'    |
| ODDF      | 5'-TTTAGCATTGGGTGGGACTC-3'    | ODDR      | 5'-CTTGGCGATTTGCATTGGTTA-3'   |
| CSAF      | 5'-GCCAATATACCGAGGACAGAAG-3'  | CSAR      | 5'-CAACCGCAAGATCACAAACAG-3'   |
| FAB1AF    | 5'-AGCAGTTCTCAAAGGAGCTAAA-3'  | FAB1AR    | 5'-ACCTTCGTGCGACAATAAAA-3'    |

|           |                               |           |                               |
|-----------|-------------------------------|-----------|-------------------------------|
| PP2CF     | 5'-ACTGACCAGGCAATCCTTTC-3'    | PP2CR     | 5'-ATCCATAACCTTCGGCCATTTA-3'  |
| Atactin2F | 5'- CAGAAGGATGCATATGTTGGTG-3' | Atactin2R | 5'- TGTAGAAAGTGTGATGCCAGAT-3' |

### **Method S1.**

Total RNA was extracted from the leaves of 7-year-old *S. album* trees using Eastep<sup>®</sup> Super Total RNA Extraction kit (Promega, Shanghai, China) according to the manufacturer's instructions. One µg of total RNA was used to synthesize first strand cDNAs for 3' or 5' end amplification with the SMARTer RACE cDNA Amplification Kit (Clontech Laboratories Inc., CA, USA) in 20 µL volume. The two specific primers were designed for completing the *SaWRKY1* 3' end (F1: 5'-ACCCTACTCAGCCCGA GCAGAA-3'; F2: 5'-GGTGGAACAGATGGCTACC TCA-3') and 5' end (F1: 5'- GTTTCTTGTTTTTCGGCACTCAC-3'; F2: 5'-CGTGG CGGAGAGGGTTCG-3') with nested PCR. PCR products were purified using the Gel Extraction Kit (Dongsheng Biotech, Guangzhou, China). Purified fragments were then cloned into pMD-18-T vector (Takara, Dalian, China) and sequenced at the Beijing Genomics Institute (BGI, Shenzhen, China). After sequence comparison, the full open-reading frame of *SaWRKY1* was amplified using gene-specific primers (F: 5'-ATGGATTAC TCTTCTTGGACGGC-3'; R: 5'-TCAA AATTTTTCATTTTGACTTT-3') by RT-PCR.

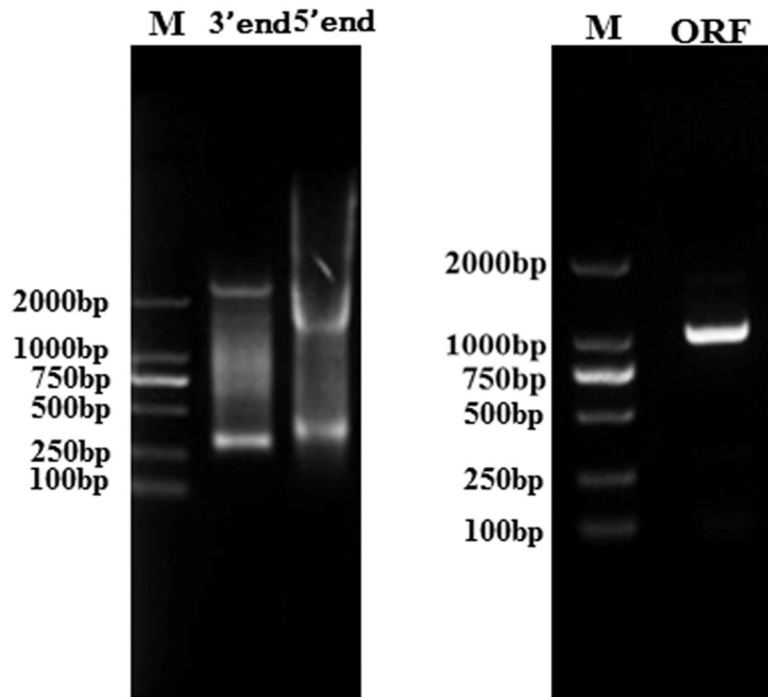

**Figure S3.** Amplification of 3' and 5' ends, as well as the ORF, of *SaWRKY1*.

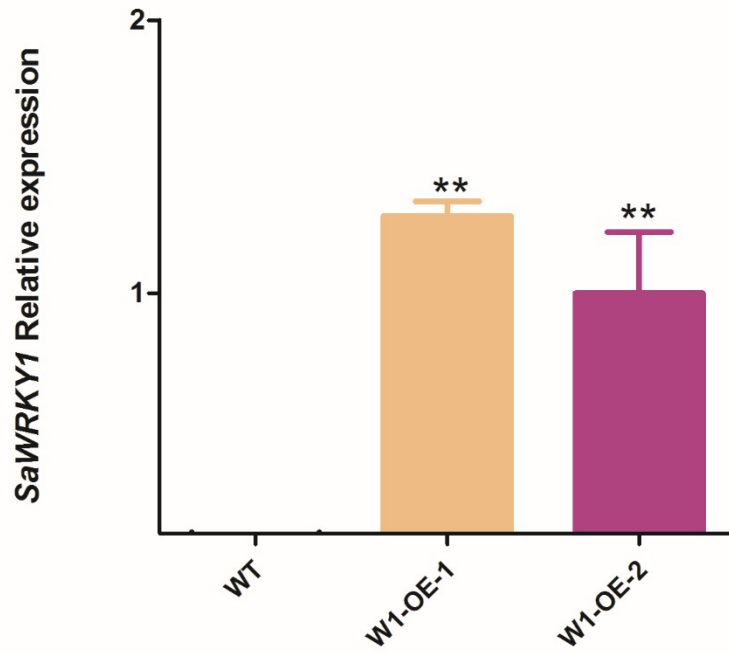

**Figure S4.** RT-qPCR analysis of *SaWRKY1* gene expression in wild type (WT) and transgenic *Arabidopsis*. Values shown are the means of three independent biological replicates  $\pm$  SE. Asterisk indicates significance at  $P < 0.01$  between WT and transgenic lines using Duncan's multiple range test. *Atactin2* (AT3G18780) was used as the internal reference gene.
